# Supplementary material
Source: PubMed Central journal article supplement (PMC4403091)
Supplement: bph0172-2246-sd1.pdf [file bph0172-2246-sd1.pdf]

## Supplementary Figure

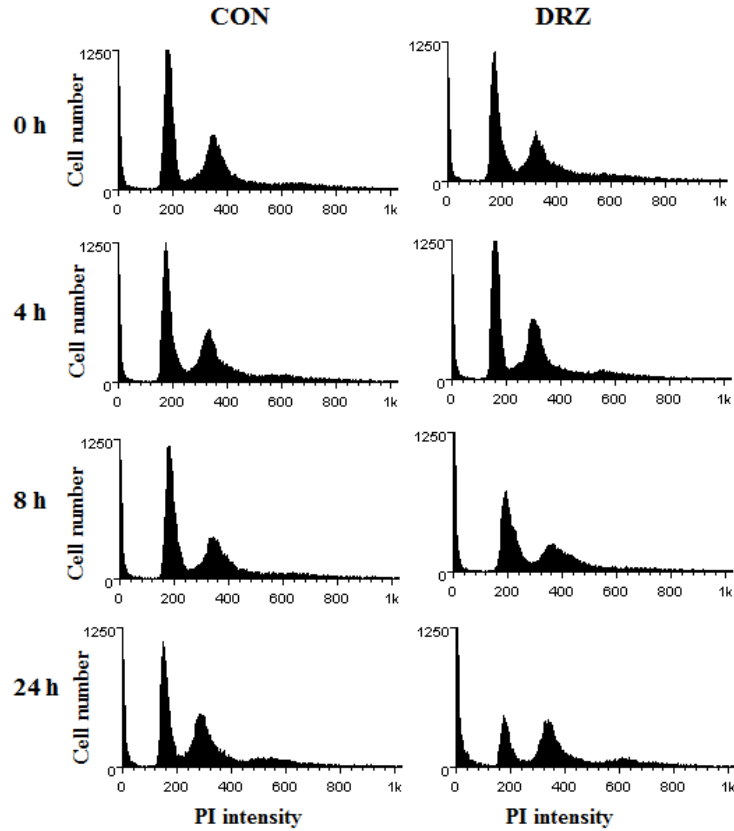

**DRZ exposure led to cell cycle arrest at G2/M. HTETOP cells was exposed to 100 μM DRZ or DMSO for indicated time periods. DNA was stained with PI and cell cycle distribution was examined by FACS analysis. The PI intensity was plotted against cell numbers.**
